# Supplementary material for: Efficient synthesis of polycarbonate ether polyol via copolymerization of CO2 and 1,2-butylene oxide over a layered Zn–Co double metal cyanide catalyst
Source: Royal Society of Chemistry journal article supplement (doi:10.1039/d4ra06913g), 2024-01-01
Supplement: d4ra06913g1.pdf [file d4ra06913g1.pdf]

## Supplementary information

# **Efficient synthesis of polycarbonate ether polyol via copolymerization CO<sub>2</sub> and 1,2-butylene oxide catalyst over layered Zn-Co double metal cyanide**

Chen Liu <sup>a,b</sup>, Yan Cao <sup>a</sup>, Xianqiang Zeng <sup>a</sup>, Zheng Zheng <sup>a</sup>, Ziqiang Han <sup>a</sup>, Peng He <sup>a</sup>, Ligu Wang <sup>\*a,c</sup>

<sup>a</sup> CAS Key Laboratory of Green Process and Engineering, National Engineering Research Center of Green Recycling for Strategic Metal Resources, Institute of Process Engineering, Chinese Academy of Sciences, Beijing, 100190, China

<sup>b</sup> School of Chemistry and Chemical Engineering, University of Jinan, Jinan 250000, China

<sup>c</sup> School of Chemical Engineering, University of Chinese Academy of Sciences, Beijing 100049, China

\* Corresponding Author. E-mail: lgwang@ipe.ac.cn (L.G. Wang)

## Characterization methods

FTIR result was obtained by a Nicolet 6700 Flex FTIR spectrometer using the standard KBr disc method of 4000 to 500  $\text{cm}^{-1}$ . XPS analysis was performed on an X-ray photoelectron spectrometer with monochromatic Al K $\alpha$  ( $h\nu = 1486.6 \text{ eV}$ ). Scanning electron microscopy (SEM) images were obtained on Hitachi-S4800 scanning electron microscope, the sample was placed on the sample table about 10-15cm away from the evaporation source for rotation and gold spraying (10 KV 60 s). A Bruker D8 Advance X-ray diffractometer was used for wide-angle diffraction testing of the samples. The scanning range was 5-90° and the scanning rate was 5 °/min. TEM images were obtained using a high-resolution field emission transmission electron microscope (FEI Tecnai G2 F20). N<sub>2</sub> physical adsorption isotherm was obtained by an adsorption apparatus (Micromeritics 3flex) at -196 °C. Before the measurements, the samples were vacuumized at 150 °C for 12 h. Brunauer-Emmett-Teller (BET) equation was used to measure the specific surface area ( $S_{\text{BET}}$ ), Use t-plot to determine The specific external surface area ( $S_{\text{ext}}$ ). *In situ* FTIR analysis using Mettler-Toledo ReactIR 15 reaction analysis system, data analysis using ReactIR(7.1) software, spectral scanning interval of 30 s, absorption peaks of 1, 2-butylene Carbonate (BC)  $\nu(\text{C}=\text{O})$  at 1819  $\text{cm}^{-1}$ , At 1752  $\text{cm}^{-1}$  is the  $\nu(\text{C}=\text{O})$  absorption peak of carbonate units and at 1101  $\text{cm}^{-1}$  is the  $\nu(\text{C}-\text{O})$  absorption peak of ether units. <sup>1</sup>H NMR and <sup>13</sup>C NMR data were obtained from Bruker AV500 using CDCl<sub>3</sub> as solvent. The amount of average molecular weight ( $M_n$ ) and dispersity ( $D$ ) of the samples were collected by gel permeation chromatography (GPC). The instrument model is Shimadzu LC20. The sample was dissolved in HPLC grade THF at a concentration of about 5 mg· L<sup>-1</sup>. Calibration was performed using the polystyrene sample standard and measured at 1 mL/min flow rate at 35 °C. The DSC test was performed using a differential scanning calorimeter (TA DSC 250) under a nitrogen atmosphere. The sample was heated from -90 °C to 110 °C at a rate of 10 °C/min, cooled to -90 °C after stabilization, and then continued to be heated to 110 °C at a rate of 10 °C/min

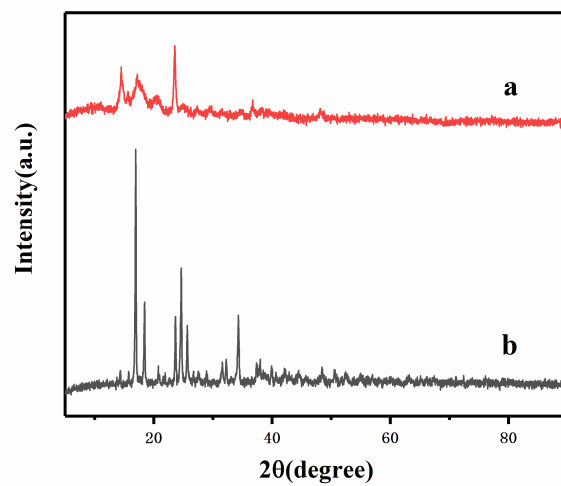

**Fig. S1.** X-ray powder diffraction patterns of (a) DMC, (b) L-DMC.

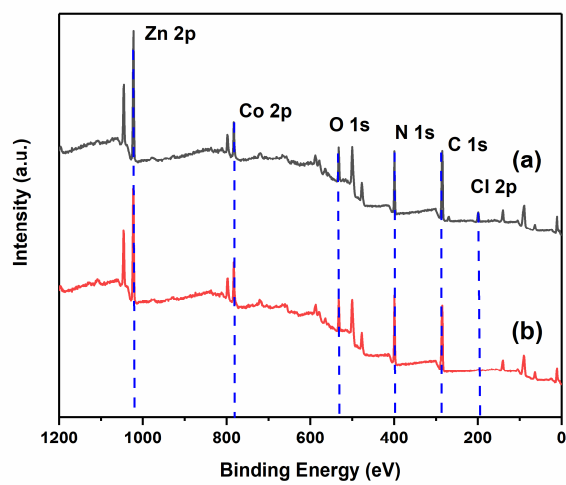

**Fig. S2** XPS spectra of (a) DMC and (b) L-DMC.

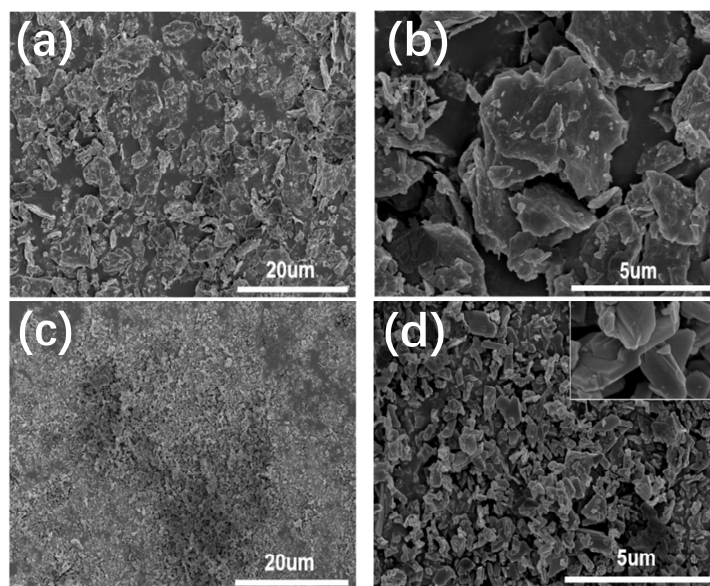

**Fig. S3.** SEM images (a, b) DMC, (c, d) L-DMC.

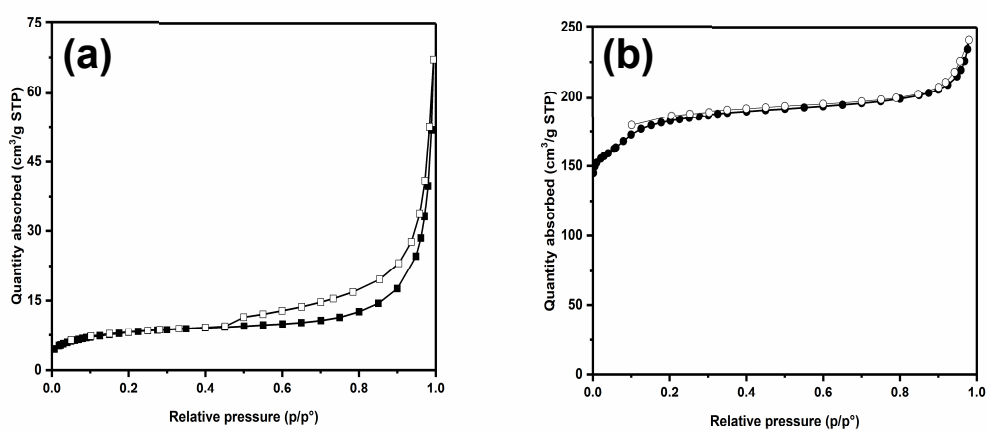

**Fig. S4** Nitrogen physisorption isotherms of (a)DMC, (b)L-DMC.

**Table S1.**Textural properties determined from N<sub>2</sub> physisorption of the DMC and L-DMC.

| Catalyst | S <sub>BET</sub> (m <sup>2</sup> /g) | S <sub>ext</sub> (m <sup>2</sup> /g) |
|----------|--------------------------------------|--------------------------------------|
| DMC      | 26                                   | 21                                   |
| L-DMC    | 668                                  | 32                                   |

**Table S2.**Influence of chain transfer agent type on the copolymerization of CO<sub>2</sub> and BO<sup>a</sup>

| Entry | chain transfer agent | f <sub>CO<sub>2</sub></sub> <sup>b</sup> (%) | W <sub>BC</sub> <sup>b</sup> (wt%) | M <sub>n</sub> <sup>c</sup> (g/mol) | D <sup>c</sup> | Productivity <sup>d</sup> (g polymer /g catalyst) |
|-------|----------------------|----------------------------------------------|------------------------------------|-------------------------------------|----------------|---------------------------------------------------|
| 1     | PPG-400              | 10.9                                         | 7.3                                | 4800                                | 2.2            | 413                                               |
| 2     | 1,4-BDO              | 30.3                                         | 8.2                                | 10700                               | 2.8            | 1239                                              |
| 3     | SA                   | —                                            | —                                  | —                                   | —              | —                                                 |
| 4     | —                    | 29.8                                         | 6.9                                | 18300                               | 2.3            | 1553                                              |

<sup>a</sup> Polymerization conditions: BO 10 mL, chain transfer agents 0.7 mmol, L-DMC 8.0 mg, 3 MPa, 110 °C, 4 h. <sup>b</sup> Determined by <sup>1</sup>H NMR and Formula (1), (2). <sup>c</sup> Determined by GPC. <sup>d</sup> Determined according to  $W_{\text{product}}/W_{\text{cat}}$ .

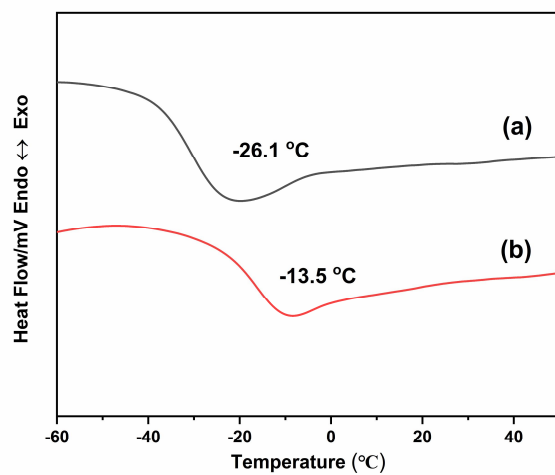

**Fig. S5** DSC thermograms of the copolymerization of CO<sub>2</sub> and BO with different CO<sub>2</sub> incorporation fraction: (a) 18.0% (b) 30.3%.

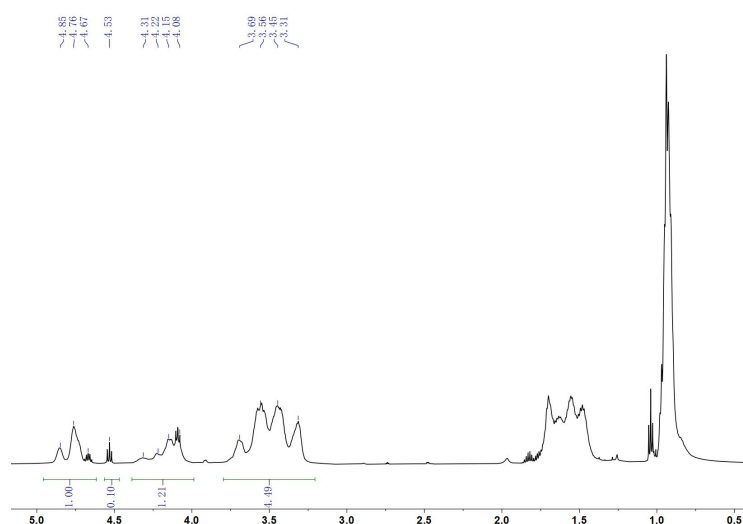

**Fig. S6.** <sup>1</sup>H NMR spectrum of polycarbonate ether polyol produced by L-DMC catalyst (entry 8, Table 1) in CDCl<sub>3</sub>.

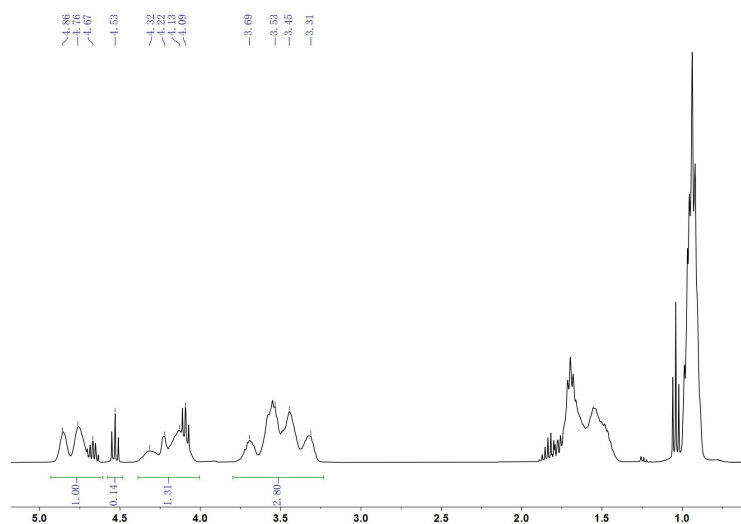

**Fig. S7.**  $^1\text{H}$  NMR spectrum of polycarbonate ether polyol produced by L-DMC catalyst (entry 9, Table 1) in  $\text{CDCl}_3$ .

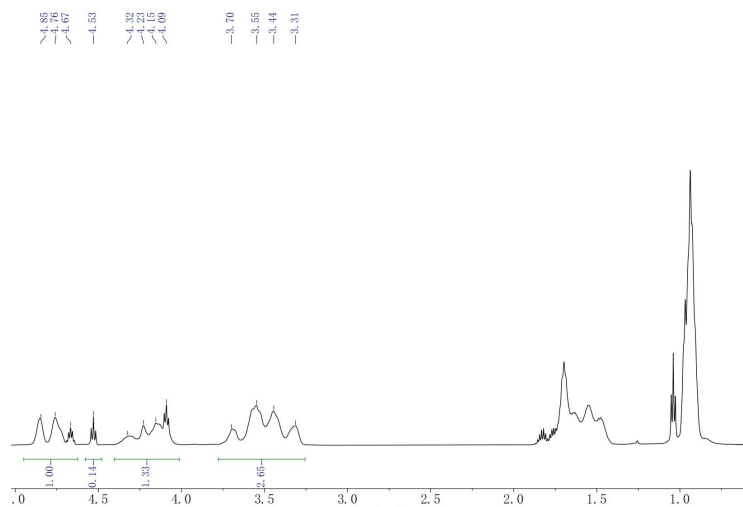

**Fig. S8.**  $^1\text{H}$  NMR spectrum of polycarbonate ether polyol produced by L-DMC catalyst (entry 2, Table 1) in  $\text{CDCl}_3$ .

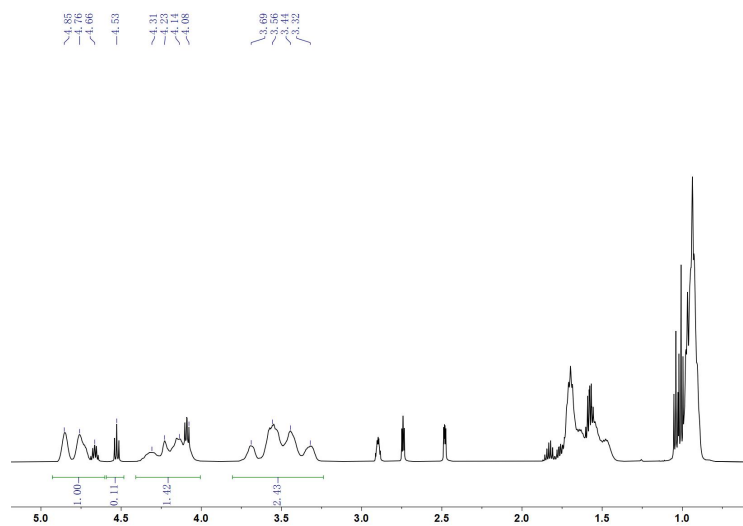

**Fig. S9.**  $^1\text{H}$  NMR spectrum of polycarbonate ether polyol produced by L-DMC catalyst (entry 10, Table 1) in  $\text{CDCl}_3$ .



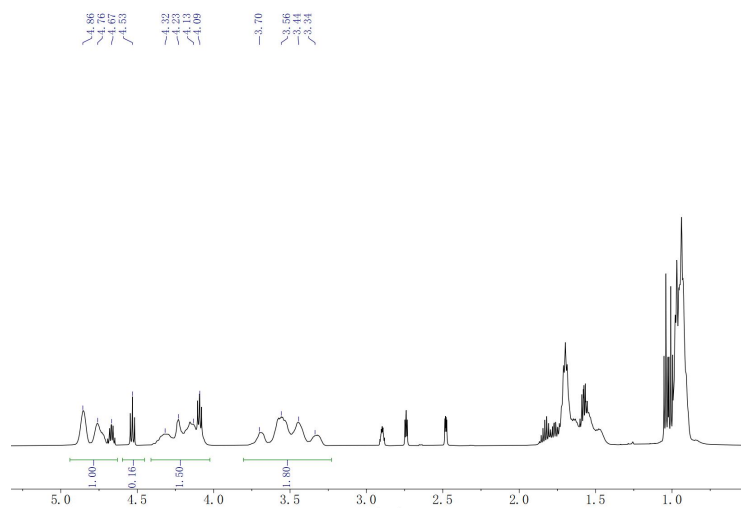

**Fig. S10.**  $^1\text{H}$  NMR spectrum of polycarbonate ether polyol produced by L-DMC catalyst (entry 11, Table 1) in  $\text{CDCl}_3$ .

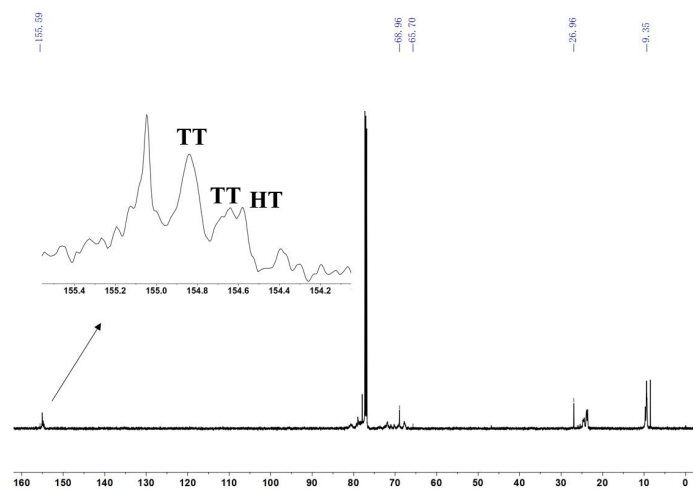

**Fig. S11.**  $^{13}\text{C}$  NMR spectrum of polycarbonate ether polyol produced by L-DMC catalyst (entry 2, Table 1) in  $\text{CDCl}_3$ .

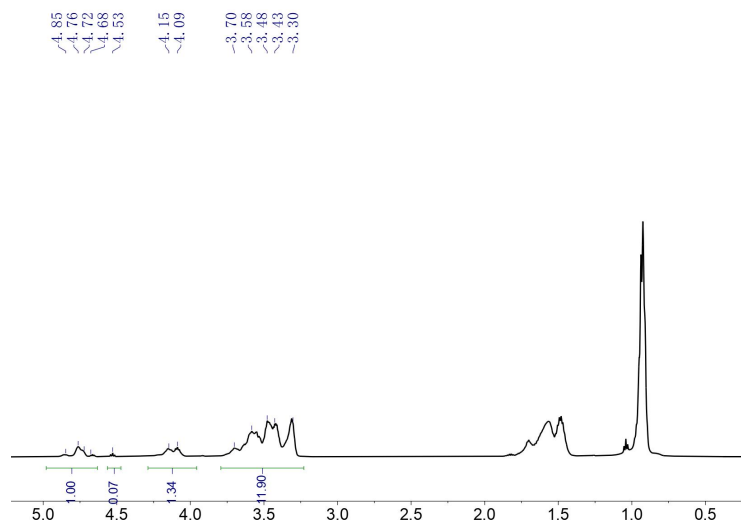

**Fig. S12.**  $^1\text{H}$  NMR spectrum of polycarbonate ether polyol produced by DMC catalyst (entry 12, Table 1) in  $\text{CDCl}_3$ .

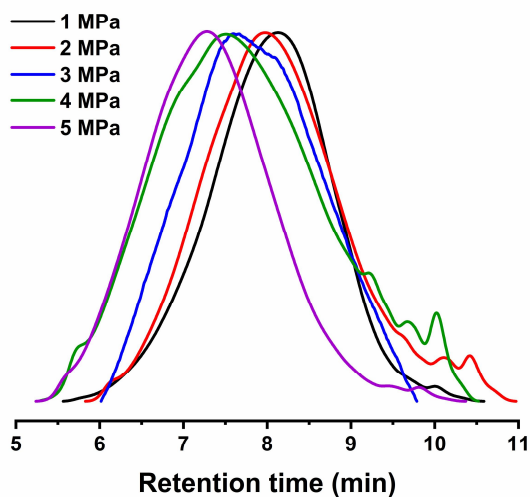

**Fig. S13.** the corresponding GPC traces of polycarbonate ether polyol ( $P_{\text{CO}_2}$  = 1 MPa, 2 MPa, 3 MPa, 4 MPa and 5 MPa).

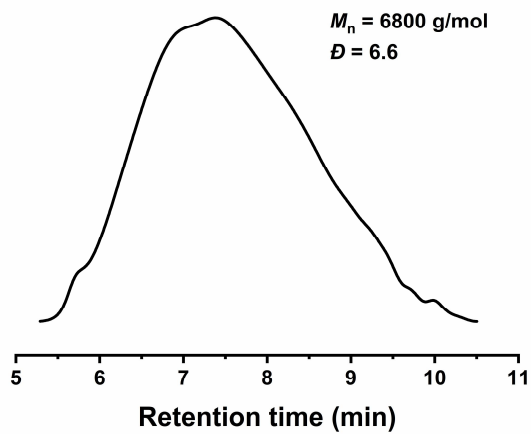

**Fig. S14.** the corresponding GPC trace of polycarbonate ether polyol (entry 3, Table 1).

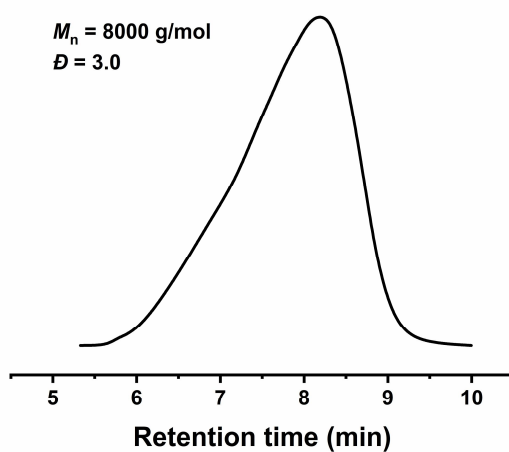

**Fig. S15.** the corresponding GPC trace of polycarbonate ether polyol (entry 6, Table 1).

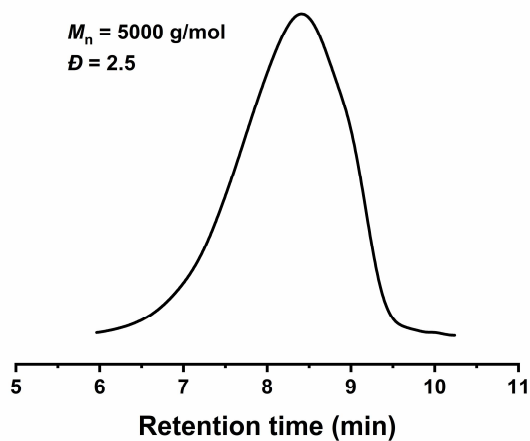

Fig. S16. the corresponding GPC trace of polycarbonate ether polyol (entry 12, Table 1).

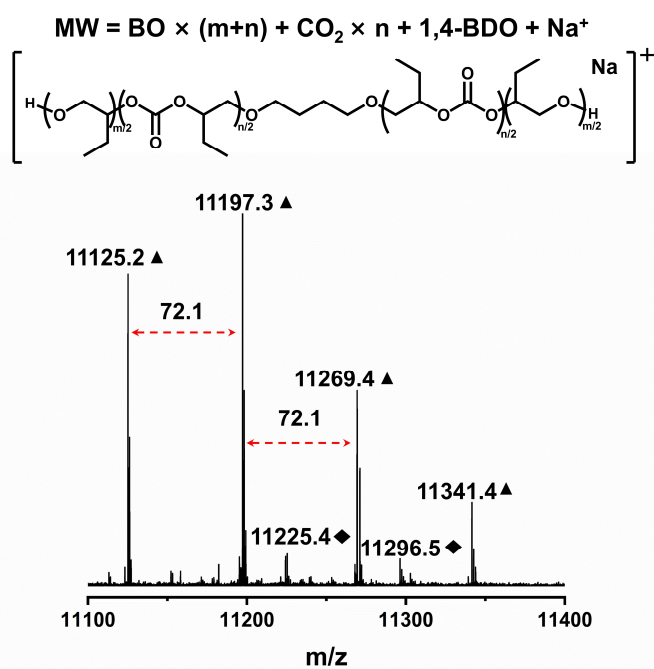

Fig. S17. MALDI-TOF MS spectrum of polycarbonate ether polyol catalyzed by L-DMC (entry 2, Table 1).
